# Supplementary material for: Essential Oil Yield and Composition of the Balkan Endemic Satureja pilosa Velen. (Lamiaceae)
Source: PubMed Central journal article supplement (PMC7070593; doi:10.3390/molecules25040827), 2020-02-13

**Supplemental Table 1.** Concentration range (in %) of the essential oil constituents that were identified in all collected samples of *Satureja pilosa*.

| Constituent Number | Volatile Constituent          | RTime  | Concentration Range (min-max, in %) |
|--------------------|-------------------------------|--------|-------------------------------------|
| 1                  | $\alpha$ -thujene             | 5.843  | 0.0 – 1.65                          |
| 2                  | $\alpha$ -pinene              | 6.045  | 0.0 – 1.25                          |
| 3                  | camphene                      | 6.454  | 0.0 – 0.99                          |
| 4                  | oct-1-en-3-ol                 | 7.262  | 0.0 – 1.15                          |
| 5                  | myrcene                       | 7.629  | 0.0 – 2.99                          |
| 6                  | $\alpha$ -terpinene           | 8.514  | 0.0 – 3.91                          |
| 7                  | <i>p</i> -cymene              | 8.813  | 0.0 – 35.44                         |
| 8                  | unknown                       | 8.944  | 0.0 – 1.46                          |
| 9                  | <i>cis</i> - $\beta$ -ocimene | 9.205  | 0.0 – 3.35                          |
| 10                 | $\gamma$ -terpinene           | 10.017 | 0.0 – 17.21                         |
| 11                 | unknown                       | 10.337 | 0.0 – 0.91                          |
| 12                 | unknown                       | 11.530 | 0.18 - 1.88                         |
| 13                 | <i>endo</i> -borneol          | 14.302 | 0.5 – 4.09                          |
| 14                 | terpinen-4-ol                 | 14.755 | 0.32 – 1.37                         |
| 15                 | <i>p</i> -cymen-8-ol          | 15.089 | 0.07 – 0.72                         |
| 16                 | carvacrol methyl ether        | 17.538 | 0.00 – 3.93                         |
| 17                 | thymoquinone                  | 17.760 | 0.00 – 9.74                         |
| 18                 | thymol                        | 19.958 | 0.2 – 75.05                         |
| 19                 | carvacrol                     | 20.303 | 2.28 – 93.37                        |
| 20                 | trans- caryophyllene          | 24.986 | 0.00 – 3.75                         |
| 21                 | $\beta$ -bisabolene           | 28.570 | 0.00 – 3.49                         |
| 22                 | $\delta$ -cadinene            | 29.113 | 0.00 – 1.28                         |
| 23                 | spathulenol                   | 31.234 | 0.00 – 5.76                         |
| 24                 | caryophyllene oxide           | 31.445 | 0.36 – 4.55                         |
| <b>25</b>          | thymohydroquinone             | 30,897 | 0.00 – 1.9                          |

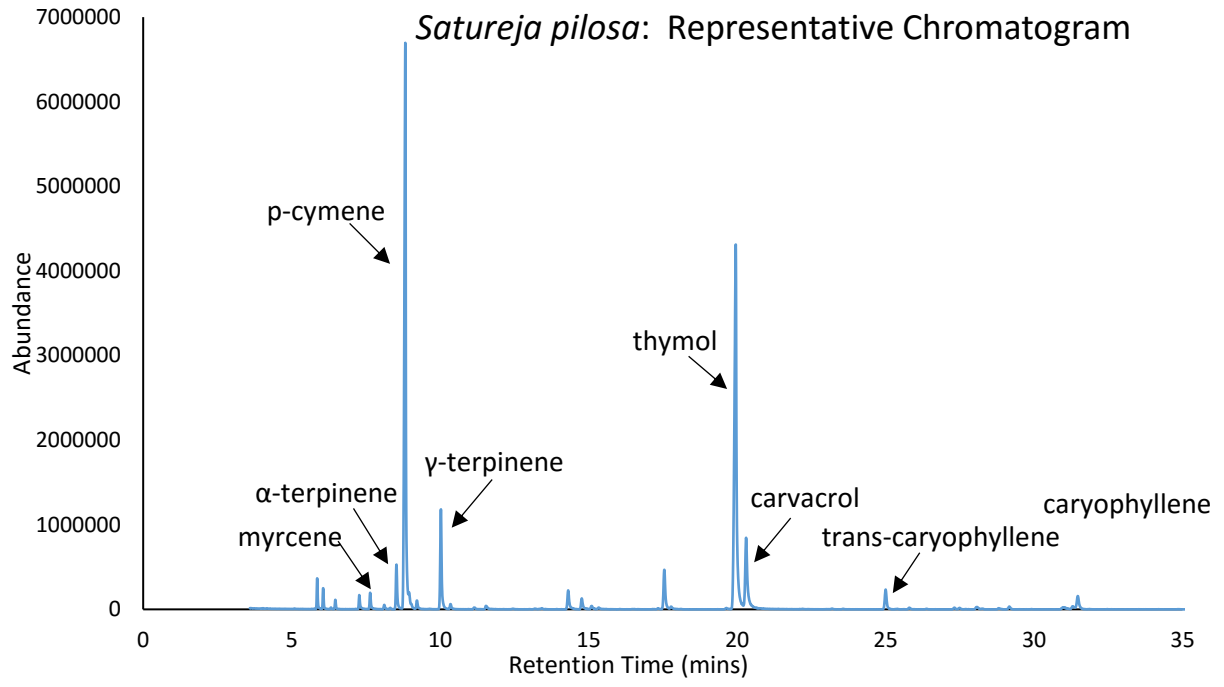

Supplement: molecules-25-00827-s001.pdf [file molecules-25-00827-s001.pdf]
